# Supplementary material for: Matched Targeted Therapy for Pediatric Patients with Relapsed, Refractory, or High-Risk Leukemias: A Report from the LEAP Consortium
Source: Oxford University Press journal article supplement (doi:10.1158/2159-8290.cd-20-0564), 2021-02-09
Supplement: 21598290cd200564-sup-242391_2_supp_6820075_qmf2p5.docx [file 21598290cd200564-sup-242391_2_supp_6820075_qmf2p5.docx]

| **Reason** | **N (%)** |
| --- | --- |
| Standard therapy available/used | 61 (59) |
| Other clinical trial available | 20 (19) |
| Recommendation is pre-clinical (need clinical trial data) | 3 (3) |
| Drug not available | 2 (2) |
| Drug not available in correct formulation | 2 (2) |
| No pediatric data/dose | 0 |
| Insurance denied/unaffordable | 0 |
| Subject too ill/progressive disease | 11 (11) |
| Subject unable to tolerate therapy | 0 |
| Patient lost to follow up | 2 (2) |
| Family declined | 2 (2) |

**Supplementary Table 3:** Reasons for not using targeted therapy recommendation
